# Supplementary material
Source: PubMed Central journal article supplement (PMC3971054)
Supplement: NIHMS498742-supplement-supplement_1.pdf [file NIHMS498742-supplement-supplement_1.pdf]

## Supplementary Material

### Supplementary Figures

**Supplementary Figure 1.** Schematic representation of our scoring system for regional cardiac involvement. A 5-segment RV and 17-segment LV model<sup>13</sup> was used to score cardiac regional involvement. Abbreviations: LV: left ventricular, RV: right ventricular, RVOT: right ventricular outflow tract.

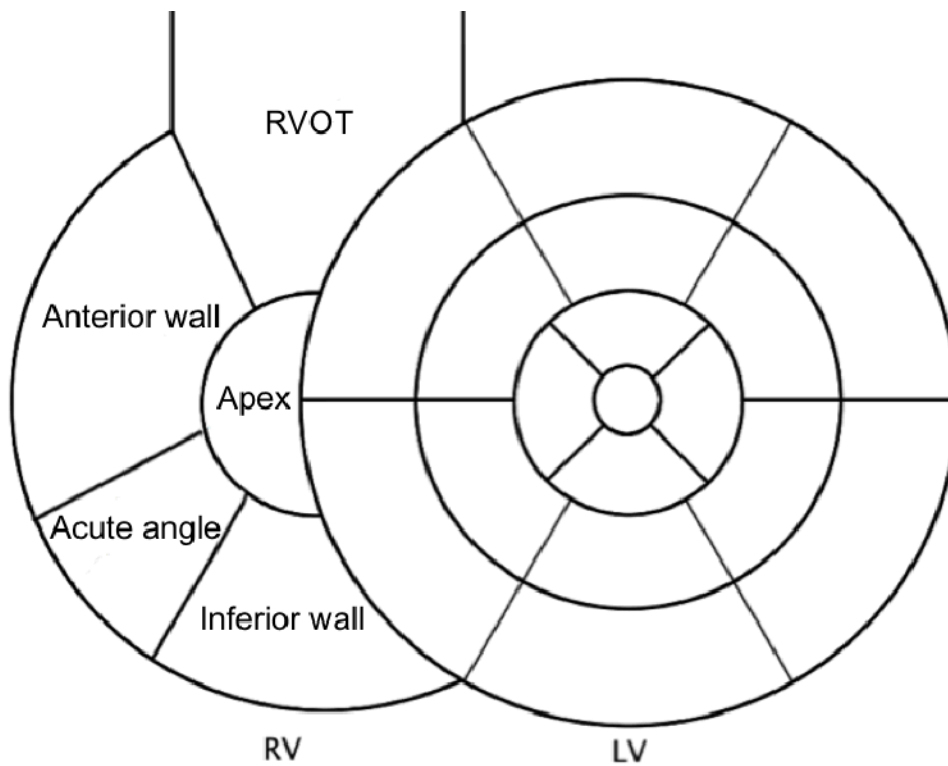

**Supplementary Figure 2.** Epicardial electroanatomic voltage maps for 11 patients who underwent a complete electrophysiological study. Numbers in the images refer to sites of successful VT ablation in these patients (Figure 5B in the main manuscript). Electroanatomic scar (<0.5 mV) is colored red; normal and low-voltage myocardium ( $\geq 0.5$  mV) is colored purple. Abbreviations: VT: ventricular tachycardia.

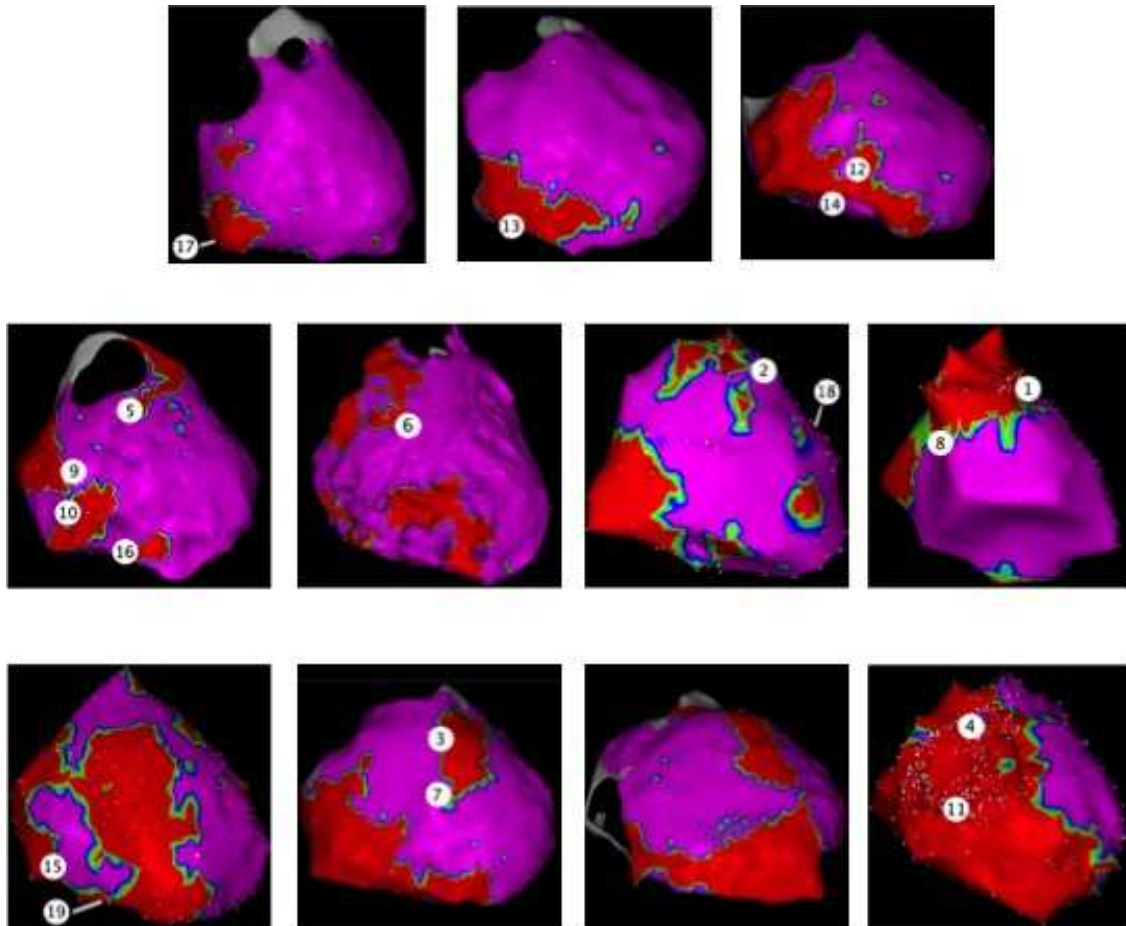

**Supplementary Figure 3.** Endocardial electroanatomic voltage maps for 11 patients who underwent a complete electrophysiological study. Electroanatomic scar (<0.5 mV) is colored red; normal and low-voltage myocardium ( $\geq 0.5$  mV) is colored purple.

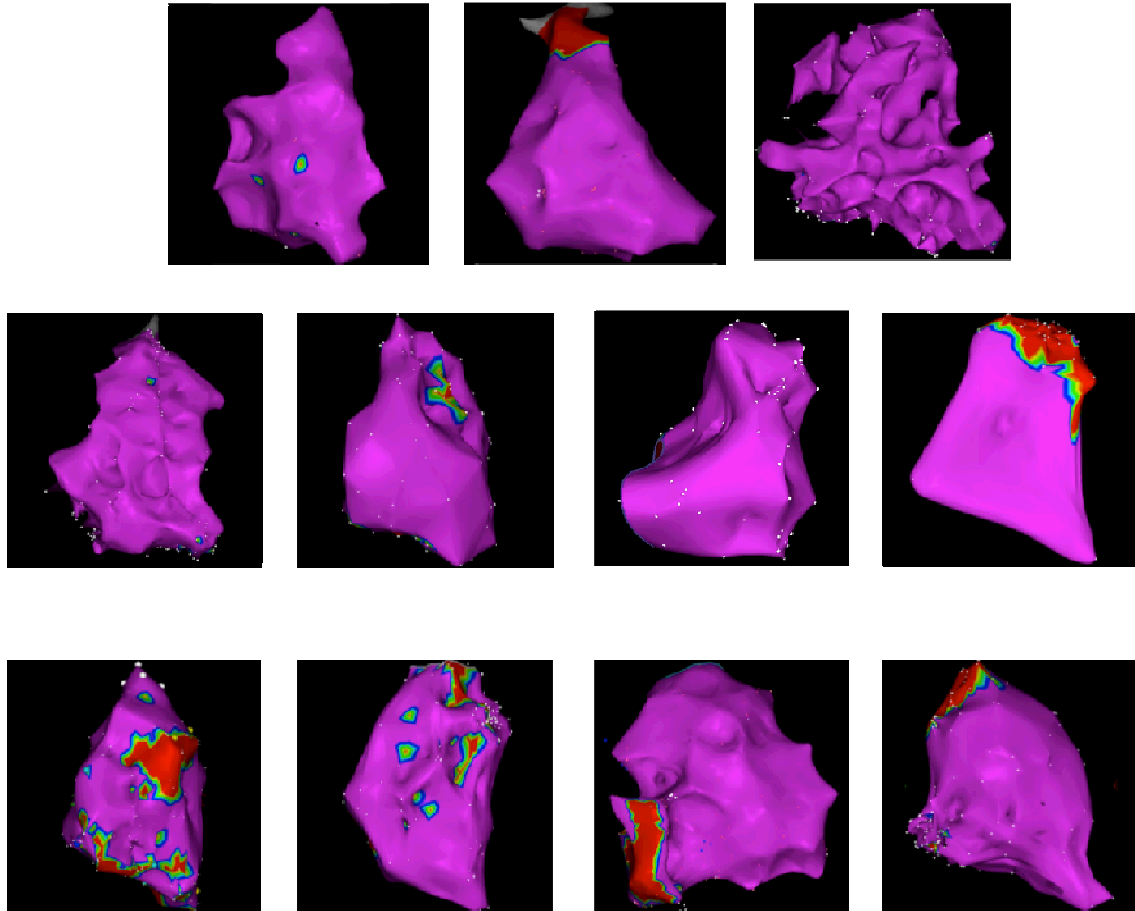

**Supplementary Figure 4.** Representative example of correspondence between epicardial scar (<0.5 mV) and endocardial low voltage area (<1.5 mV) in an ARVD/C patient. Abbreviations: ARVD/C: Arrhythmogenic Right Ventricular Dysplasia/Cardiomyopathy.

**(A).** Anteroposterior view of the epicardial electroanatomic voltage map showing a large area of epicardial scar involving the subtricuspid region, RV inferior wall, and RV free wall. An encircled area of normal voltage can be appreciated in the RV anterior wall. Abbreviations: RV: right ventricular, RVOT: right ventricular outflow tract.

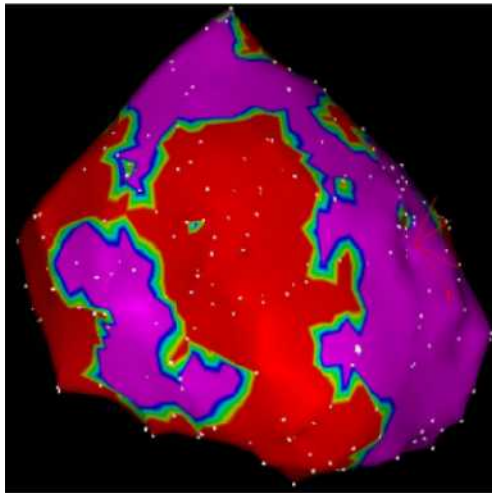

**(B).** Anteroposterior view of the endocardial electroanatomic voltage map revealing low voltage in the subtricuspid region, RV inferior wall, and RV anterior wall. Epicardial scar and endocardial low voltage show a very similar regional distribution. Abbreviations: RV: right ventricular.

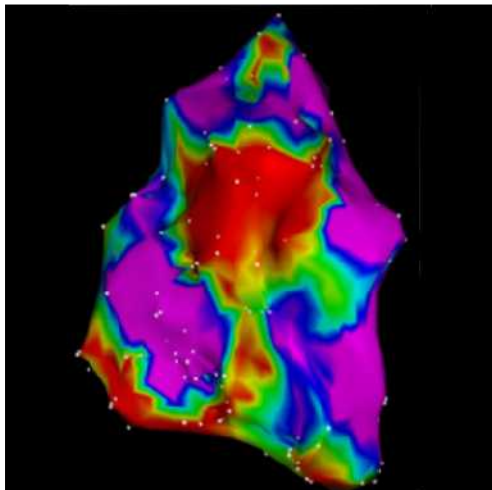

**Supplementary Figure 5.** New Triangle of Structural Abnormalities in Early ARVD/C. Structural abnormalities in ARVD/C preferentially locate to the epicardial subtricuspid region (1), the RV basal anterior wall (2), and the LV posterolateral wall (3). These regions are all late activated region of the normal heart during sinus rhythm, depicted by isochronic activation times (based on Durrer et al, Circulation 1970; 41:899-912). This activation delay is aggravated in ARVD/C. Abbreviations: ARVD/C: Arrhythmogenic Right Ventricular Dysplasia/Cardiomyopathy, LV: left ventricular, RV: right ventricular.

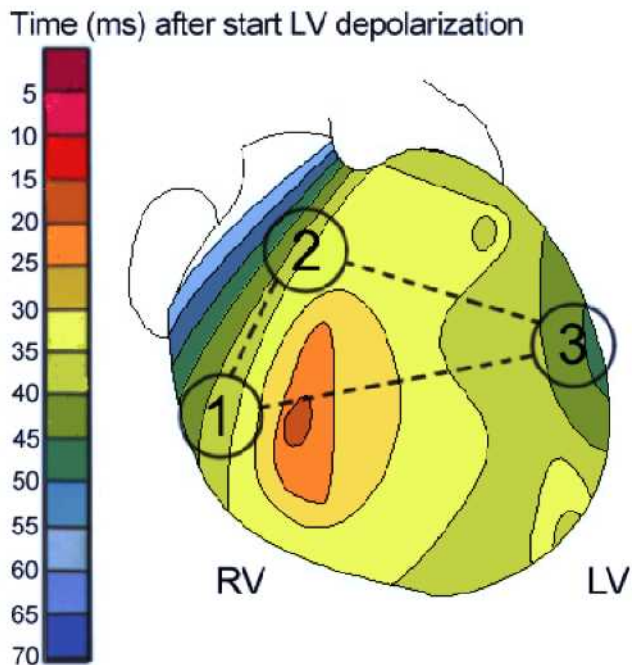

## Supplementary Tables

**Supplementary Table 1.** Mutations among the study population

| Gene; n (%)                                              | Amino Acid Change                                     | Nucleotide Change                          | Overall (n=80) | CMR (n=74) | EPS (n=11) |
|----------------------------------------------------------|-------------------------------------------------------|--------------------------------------------|----------------|------------|------------|
| <b>PKP2; 66 (83)</b>                                     | R79X                                                  | 235C>T                                     | 10             | 9          | 1          |
|                                                          | Mutant splice product                                 | 2146-1G>C                                  | 8              | 7          | 1          |
|                                                          | W538X                                                 | 1613G>A                                    | 5              | 5          | 0          |
|                                                          | A733fsX740                                            | 2197_2202delinsG                           | 3              | 3          | 0          |
|                                                          | Mutant splice product                                 | 2489+1G>A                                  | 3              | 3          | 0          |
|                                                          | V837fsX930                                            | 2509delA                                   | 3              | 3          | 0          |
|                                                          | S406fsX4                                              | 1211-1212insT                              | 3              | 3          | 0          |
|                                                          | R413X                                                 | 1237C>T                                    | 3              | 3          | 0          |
|                                                          | P323fsX350                                            | 968_971delAGGC                             | 3              | 3          | 0          |
|                                                          |                                                       | deletion exon 1-14                         | 3              | 3          | 0          |
|                                                          | P672fsX683                                            | 2013delC                                   | 3              | 2          | 1          |
|                                                          | F424S                                                 | 1271T>C                                    | 2              | 2          | 0          |
|                                                          | Mutant splice product                                 | 2489+4A>C                                  | 2              | 2          | 0          |
|                                                          | V587I                                                 | 1759G>A                                    | 2              | 2          | 0          |
|                                                          | Q617X                                                 | 1849C>T                                    | 1              | 1          | 1          |
|                                                          | S50fsX110                                             | 148_151delACAG                             | 1              | 1          | 0          |
|                                                          | S615F                                                 | 1844C>T                                    | 1              | 1          | 0          |
|                                                          | W538X                                                 | 1613G>A                                    | 1              | 1          | 0          |
|                                                          | S587fsX69                                             | 1759delG                                   | 1              | 1          | 0          |
|                                                          | Q133X                                                 | 397C>T                                     | 1              | 1          | 0          |
|                                                          | E601fsX55                                             | 1803delC                                   | 1              | 1          | 0          |
|                                                          | V587fsX69                                             | 1760delT                                   | 1              | 1          | 0          |
|                                                          | V725SfsX19                                            | 2169_2172dupAGTT                           | 1              | 1          | 1          |
|                                                          | C796R                                                 | 2386T>C                                    | 1              | 1          | 0          |
|                                                          | R651X                                                 | 1951C>T                                    | 1              | 0          | 1          |
|                                                          | L437HfsX11                                            | 1307_1315delinsATTTAGTT                    | 1              | 0          | 1          |
|                                                          | Y221X                                                 | 663C>A                                     | 1              | 0          | 1          |
| <b>DSG2; 5 (6)</b>                                       | T335A                                                 | 1003A>G                                    | 3              | 3          | 1          |
|                                                          | R46W                                                  | 136C>T                                     | 1              | 1          | 1          |
|                                                          | T1047R                                                | 3140C>G                                    | 1              | 1          | 1          |
| <b>DSP; 3 (4)</b>                                        | E422K                                                 | 1264G>A                                    | 1              | 1          | 0          |
|                                                          | R160X                                                 | 478C>T                                     | 1              | 1          | 0          |
|                                                          | Q51X                                                  | 151C>T                                     | 1              | 1          | 0          |
| <b>DSC2; 2 (3)</b>                                       | G220R                                                 | 658G>A                                     | 1              | 1          | 0          |
|                                                          | E426K                                                 | 1276G>A                                    | 1              | 1          | 0          |
| <b>Compound/<br/>Digenic<br/>Heterozygote;<br/>4 (5)</b> | Mutant splice product (DSG2) + 1038_1040delGAA (DSG2) | 523+2T>C (DSG2) + K346del (DSG2)           | 1              | 1          | 0          |
|                                                          | S50fsX110 (PKP2) + T335A (DSG2)                       | 148_151delACAG (PKP2) + 1003A>G (DSG2)     | 1              | 1          | 0          |
|                                                          | C796R (PKP2) + T335A (DSG2)                           | 2386T>C (PKP2) + 1003A>G (DSG2)            | 1              | 1          | 0          |
|                                                          | A358T (DSG2)                                          | 1072G>A (DSG2) + deletion exon 1-14 (PKP2) | 1              | 1          | 0          |

Abbreviations: CMR: cardiac magnetic resonance imaging, *DSC2*: Desmocollin-2, *DSG2*: desmoglein-2, *DSP*: Desmoplakin, EPS: electrophysiological study, *PKP2*: Plakophilin-2.

**Supplementary Table 2.** Patient Characteristics in the Johns Hopkins and Dutch CMR cohort.

|                            | <b>Overall<br/>(n=74)</b> | <b>USA cohort<br/>(n=56)</b> | <b>Dutch cohort<br/>(n=18)</b> | <b>p-value</b> |
|----------------------------|---------------------------|------------------------------|--------------------------------|----------------|
| Male                       | 31 (42)                   | 28 (49)                      | 3 (17)                         | 0.013          |
| Age at presentation (yrs)  | 30.5 ± 14.7               | 28.9 ± 13.6                  | 35.6 ± 17.3                    | NS             |
| Proband                    | 34 (46)                   | 29 (52)                      | 5 (28)                         | NS             |
| Symptomatic                | 50 (68)                   | 37 (66)                      | 13 (72)                        | NS             |
| Syncope                    | 22 (30)                   | 18 (32)                      | 4 (22)                         | NS             |
| Presyncope                 | 19 (26)                   | 16 (29)                      | 3 (17)                         | NS             |
| Palpitations               | 39 (53)                   | 28 (50)                      | 11 (61)                        | NS             |
| Chest pain                 | 8 (11)                    | 6 (11)                       | 2 (11)                         | NS             |
| TFC                        | 6 (range 4-10)            | 6 (range 4-10)               | 7 (range 4-10)                 | NS             |
| Epsilon wave               | 5 (7)                     | 4 (7)                        | 1 (6)                          | NS             |
| Prolonged TAD              | 28 (37)                   | 18 (32)                      | 10 (56)                        | NS             |
| Negative T waves           | 68 (92)                   | 53 (95)                      | 15 (83)                        | NS             |
| V1-3                       | 53 (72)                   | 42 (75)                      | 11 (61)                        | NS             |
| V1-2                       | 14 (19)                   | 9 (16)                       | 5 (28)                         | NS             |
| V4-6 with complete RBBB    | 2 (3)                     | 2 (4)                        | 0 (0)                          | NS             |
| Late potentials on SAECG*  | 25/38 (66)                | 25/38 (66)                   | 0/0 (0)                        | -              |
| LBBB VT with superior axis | 17 (23)                   | 11 (20)                      | 6 (33)                         | NS             |
| LBBB VT                    | 25 (34)                   | 20 (36)                      | 5 (28)                         | NS             |
| PVC >500/24 h†             | 44/60 (73)                | 31/45 (69)                   | 13/15 (87)                     | NS             |
| Structural major TFC       | 38 (51)                   | 26 (46)                      | 12 (67)                        | NS             |
| Structural minor TFC       | 12 (16)                   | 8 (14)                       | 4 (22)                         | NS             |

\* In the Netherlands, SAECG is not clinical practice and thus not performed in the Dutch cohort. † 60 patients underwent Holter monitoring. Abbreviations: CMR: cardiac magnetic resonance, LBBB: left bundle branch block, PVC: premature ventricular complex, RBBB: right bundle branch block, SAECG: signal-averaged electrocardiograms, TAD: terminal activation duration, TFC: Task force criteria, VT: ventricular tachycardia.

**Supplementary Table 3.** CMR results for the study population.

|                                       | <b>Overall<br/>n=74</b> | <b>Limited<br/>(0-1 region)<br/>n=27</b> | <b>Moderate<br/>(2-3 regions)<br/>n=20</b> | <b>Advanced<br/>(4-5 regions)<br/>n=27</b> | <b>P-value</b> |
|---------------------------------------|-------------------------|------------------------------------------|--------------------------------------------|--------------------------------------------|----------------|
| Age at CMR (yrs)                      | 33.7 ± 15.0             | 35.9 ± 16.9                              | 31.8 ± 13.0                                | 32.9 ± 14.5                                | NS             |
| <b>Quantitative parameters</b>        |                         |                                          |                                            |                                            |                |
| RV EDV/BSA (ml/m <sup>2</sup> )       | 103.6 ± 30.7            | 85.2 ± 16.9                              | 100.3 ± 21.8                               | 124.0 ± 34.2                               | <0.001         |
| RV EF (%)                             | 41.7 ± 11.4             | 50.6 ± 6.8                               | 40.4 ± 11.3                                | 34.1 ± 8.9                                 | <0.001         |
| LV EDV/BSA (ml/m <sup>2</sup> )       | 85.8 ± 14.4             | 86.9 ± 12.9                              | 80.2 ± 14.0                                | 88.3 ± 15.7                                | NS             |
| LV EF (%)                             | 53.1 ± 7.4              | 53.9 ± 6.6                               | 54.4 ± 9.1                                 | 51.5 ± 6.8                                 | NS             |
| <b>Qualitative parameters</b>         |                         |                                          |                                            |                                            |                |
| Global RV dilatation                  | 32 (43)                 | 2 (7)                                    | 10 (50)                                    | 20 (81)                                    | <0.001         |
| Global RV hypokinesia                 | 26 (35)                 | 0 (0)                                    | 8 (40)                                     | 18 (67)                                    | <0.001         |
| RV regional wall motion abnormalities | 50 (68)                 | 3 (11)                                   | 20 (100)                                   | 27 (100)                                   | <0.001         |
| RV regional aneurysm                  | 11 (15)                 | 1 (4)                                    | 3 (16)                                     | 7 (26)                                     | NS             |
| RV regional fat infiltration          | 20/71 (28)              | 3/26 (12)                                | 7/19 (37)                                  | 10/26 (39)                                 | NS             |
| RV regional delayed enhancement       | 9/63 (14)               | 0/25 (0)                                 | 1/15 (7)                                   | 8/23 (35)                                  | 0.002          |
| Global LV dilatation                  | 5 (7)                   | 3 (11)                                   | 0 (0)                                      | 2 (7)                                      | NS             |
| Global LV hypokinesia                 | 6 (8)                   | 2 (7)                                    | 1 (5)                                      | 3 (11)                                     | NS             |
| LV regional wall motion abnormalities | 13 (18)                 | 2 (7)                                    | 0 (0)                                      | 11 (41)                                    | <0.001         |
| LV regional aneurysm                  | 1 (1)                   | 0 (0)                                    | 0 (0)                                      | 1 (4)                                      | NS             |
| LV regional fat infiltration          | 25/72 (35)              | 3/26 (12)                                | 5/20 (25)                                  | 17/26 (65)                                 | <0.001         |
| LV regional delayed enhancement       | 18/65 (28)              | 2/26 (8)                                 | 3/16 (19)                                  | 13/23 (57)                                 | <0.001         |
| <b>Fulfilment of TFC for CMR</b>      |                         |                                          |                                            |                                            |                |
| Minor TFC                             | 3 (4)                   | 1 (4)                                    | 2 (11)                                     | 0 (0)                                      | NS             |
| Major TFC                             | 36 (49)                 | 0 (0)                                    | 13 (68)                                    | 23 (85)                                    | <0.001         |

Abbreviations: BSA: body surface area, CMR: Cardiac Magnetic Resonance, EDV: end-diastolic volume, EF: ejection fraction, LV: left ventricle, RV: right ventricle.



**Supplementary Table 4.** Comparison of patients with increasing structural severity with respect to clinical variables.

|                                         | <b>Limited<br/>(0-1 region)<br/>n=27</b> | <b>Moderate<br/>(2-3 regions)<br/>n=20</b> | <b>Advanced<br/>(4-5 regions)<br/>n=27</b> | <b>P-value</b> |
|-----------------------------------------|------------------------------------------|--------------------------------------------|--------------------------------------------|----------------|
| Male                                    | 5 (19)                                   | 10 (50)                                    | 16 (59)                                    | 0.007          |
| Age at CMR (yrs)                        | 35.9 ± 16.9                              | 31.8 ± 13.0                                | 32.9 ± 14.5                                | NS             |
| TFC points                              | 5 (range 4-9)                            | 7 (range 4-9)                              | 8 (range 5-10)                             | <0.001         |
| <b>Symptomatic</b>                      | 12 (44)                                  | 14 (70)                                    | 24 (89)                                    | 0.002          |
| Syncope                                 | 4 (15)                                   | 6 (30)                                     | 12 (44)                                    | NS             |
| Presyncope                              | 4 (15)                                   | 6 (30)                                     | 9 (33)                                     | NS             |
| Palpitations                            | 9 (33)                                   | 9 (45)                                     | 21 (78)                                    | 0.003          |
| Chest pain                              | 4 (15)                                   | 1 (5)                                      | 3 (11)                                     | NS             |
| <b>ECG</b>                              |                                          |                                            |                                            |                |
| Negative T V1-3 or beyond               | 14 (52)                                  | 13 (65)                                    | 26 (96)                                    | 0.001          |
| Negative T V1-2                         | 9 (33)                                   | 4 (20)                                     | 1 (4)                                      | 0.021          |
| Epsilon wave                            | 2 (7)                                    | 0 (0)                                      | 3 (11)                                     | NS             |
| Prolonged TAD                           | 8 (30)                                   | 5 (25)                                     | 15 (56)                                    | NS             |
| <b>Holter*</b>                          |                                          |                                            |                                            |                |
| PVC count                               | 602 (range 0-14000)                      | 2230 (range 29-12579)                      | 4436 (range 769-20527)                     | 0.003          |
| >500 PVC/24 hrs                         | 11/23 (48)                               | 14/18 (78)                                 | 19/19 (100)                                | 0.001          |
| <b>SAECG†</b>                           |                                          |                                            |                                            |                |
| Filtered QRS duration (ms)              | 114 ± 22                                 | 111 ± 10                                   | 125 ± 30                                   | NS             |
| Low amplitude signal duration (ms)      | 41 ± 14                                  | 34 ± 10                                    | 53 ± 30                                    | NS             |
| Root mean square of terminal 40 ms (µV) | 26 ± 18                                  | 29 ± 15                                    | 24 ± 30                                    | NS             |
| ≥1/3 parameters abnormal                | 10/17 (59)                               | 6/11 (55)                                  | 9/12 (75)                                  | NS             |

\* 60 patients underwent Holter monitoring. † 40 patients underwent SAECG. Abbreviations: CMR: cardiac magnetic resonance, FU: follow-up, PVC: premature ventricular complex, RBBB: right bundle branch block, SAECG: signal-averaged ECG, TAD: terminal activation duration, TFC: Task Force Criteria, VT: ventricular tachycardia.
